# Supplementary material for: The Effect of Aviva Exercise Intervention on Pain Level and Body Awareness in Women with Primary Dysmenorrhea
Source: MDPI journal article supplement (doi:10.3390/medicina60010184), 2024-01-20
Supplement: s1 [file s1]

**Table S1.** Descriptive and reliability statistics of the four subscales of the BAQ-H at the T1, T2 and T3

| Scale                                          | Items | n  | Min* | Max** | Mean | Std. Dev. *** | Cronbach's alpha |
|------------------------------------------------|-------|----|------|-------|------|---------------|------------------|
| Note responses or changes in body process – T1 | 5     | 78 | 3.00 | 6.80  | 5.02 | 0.92          | 0.708            |
| Predict of bodily reaction – T1                | 7     | 78 | 2.29 | 7.00  | 4.68 | 0.90          | 0.759            |
| Sleep-wake cycle – T1                          | 7     | 78 | 3.00 | 6.57  | 5.26 | 0.80          | 0.734            |
| Onset of illness – T1                          | 3     | 78 | 2.00 | 7.00  | 5.11 | 0.92          | 0.453            |
| Note responses or changes in body process – T2 | 5     | 78 | 3.40 | 7.00  | 5.27 | 0.86          | 0.716            |
| Predict of bodily reaction – T2                | 7     | 78 | 2.29 | 6.71  | 4.90 | 0.90          | 0.808            |
| Sleep-wake cycle – T2                          | 7     | 78 | 2.86 | 7.00  | 5.39 | 0.81          | 0.798            |
| Onset of illness – T2                          | 3     | 78 | 3.00 | 7.00  | 5.26 | 0.91          | 0.432            |
| Note responses or changes in body process – T3 | 5     | 75 | 3.80 | 7.00  | 5.40 | 0.75          | 0.657            |
| Predict of bodily reaction – T3                | 7     | 75 | 3.00 | 7.00  | 5.05 | 0.86          | 0.836            |
| Sleep-wake cycle – T3                          | 7     | 75 | 3.71 | 7.00  | 5.50 | 0.75          | 0.813            |
| Onset of illness – T3                          | 3     | 75 | 2.67 | 7.00  | 5.40 | 0.91          | 0.637            |

\* Minimum \*\* Maximum \*\*\* Standard deviation
